# Supplementary material
Source: PubMed Central journal article supplement (PMC7399478)
Supplement: mmc1.pdf [file mmc1.pdf]

**Biophysical Journal, Volume 119**

**Supplemental Information**

**AimB Is a Small Protein Regulator of Cell Size and MreB Assembly**

**John N. Werner, Handuo Shi, Jen Hsin, Kerwyn Casey Huang, Zemer Gitai, and Eric A. Klein**

1 **Supplementary methods**

2

3 **Strain construction**

4 Xylose-inducible expression of conserved hypothetical proteins. Cloning of the entry-vector set  
5 of *C. crescentus* open reading frames (ORFs) was described previously (1). Plasmid pZG241,  
6 which contains a xylose-inducible promoter upstream of a Gateway cloning cassette, was used as  
7 the destination vector (2). The 224 ORFs corresponding to conserved hypothetical proteins were  
8 inserted into pZG241 using a previously described *in vivo* LR reaction (1, 3).

9

10 Chromosomal expression of *mreB-GFP<sup>SW</sup>*. The gene encoding msfGFP was cloned at the site of  
11 a loop-domain of MreB using Gibson assembly. The pNPTS-138 plasmid backbone was PCR  
12 amplified using primers pNPTS-F/R, the *mreB* upstream and downstream chromosomal DNA  
13 fragments were amplified using primers MreB-up/down-F/R, and *msfGFP* was amplified using  
14 msfGFP-F/R. The four fragments were joined using Gibson assembly. The resulting plasmid  
15 (pZG1534) was transformed into *C. crescentus*. Individual colonies were grown overnight in  
16 PYE without antibiotic selection and streaked onto PYE-3% sucrose plates to select for bacteria  
17 that lost the *sacB* cassette. Individual colonies were screened for MreB fluorescence, resulting in  
18 strain ZG1511.

19

20 Chromosomal expression of *aimB-FLAG*. The *aimB* upstream and downstream chromosomal  
21 DNA fragments were amplified using primers EK582/1150 and EK585/1151, respectively, and  
22 cloned into the HindIII/EcoRI site of pNPTS-138. The resulting plasmid (pEK391) was  
23 transformed into *C. crescentus*. Individual colonies were grown overnight in PYE without

24 antibiotic selection and streaked onto PYE-3% sucrose plates to select for bacteria that lost the  
25 *sacB* cassette. Individual colonies were screened by PCR using primers EKS212/S260, resulting  
26 in strain EK399.

27  
28 AimB overexpression strains. To generate *C. crescentus* AimB overexpression strains, the *aimB*  
29 gene was amplified using primers aimB-F/R and inserted into the NdeI/EcoRI site of pBXMCS-  
30 2 (plasmid pZG825). A FLAG-tag was added to the C-terminus of AimB by inverse-PCR with  
31 primers aimB-FLAG-F/R (plasmid pZG826). These plasmids were electroporated into NA1000  
32 or *mreB::mreB-GFP<sup>SW</sup>* to generate strains ZG870, ZG871, and EK25. To generate low-copy *E.*  
33 *coli* AimB overexpression strains, *aimB-FLAG* was PCR-amplified from pZG826 using primers  
34 EK809/810 (Ptet) or EK813/814 (Plac). Plasmid backbones were amplified with primers  
35 EK807/808 (pBbS2k, Ptet) or EK811/812 (pTrc99a, Plac). The resulting PCR fragments were  
36 ligated by Gibson assembly, yielding plasmids pEK188 (Plac) and pEK189 (Ptet); the plasmids  
37 were transformed into ZG1516 (*mreB::mreB-GFP<sup>SW</sup>*) to generate strains EK191 and EK192. For  
38 high-copy expression, Ptet-*aimB-FLAG* was amplified from pEK189 using primers EK840/841  
39 and plasmid pUC19 was amplified with primers EK838/839. The PCR products were ligated by  
40 Gibson assembly and the resulting plasmid (pEK199) was transformed into ZG1516 to yield  
41 strain EK200. High-copy expression of Jann\_2546-FLAG was achieved by PCR-amplifying  
42 Jann\_2546-FLAG from plasmid EK796 using primers EK1175/1176 and ligating the PCR  
43 product into the NdeI/EcoRI site of pBXMCS-2. The resulting plasmid (EK397) was  
44 transformed into NA1000 to yield strain EK398.

45 **Supplemental References**

46

- 47 1. Werner, J. N., E. Y. Chen, J. M. Guberman, A. R. Zippilli, J. J. Irgon, and Z. Gitai. 2009.  
48 Quantitative genome-scale analysis of protein localization in an asymmetric bacterium.  
49 PNAS 106(19):7858-7863.
- 50 2. Ingerson-Mahar, M., A. Briegel, J. N. Werner, G. J. Jensen, and Z. Gitai. 2010. The  
51 metabolic enzyme CTP synthase forms cytoskeletal filaments. Nat Cell Biol 12(8):739-  
52 746.
- 53 3. Werner, J. N., and Z. Gitai. 2010. High-throughput screening of bacterial protein  
54 localization. Methods Enzymol 471:185-204.
- 55 4. Evinger, M., and N. Agabian. 1977. Envelope-associated nucleoid from *Caulobacter*  
56 *crenscentus* stalked and swarmer cells. J Bacteriol 132(1):294-301.
- 57 5. Irnov, I., Z. Wang, N. D. Jannetty, J. A. Bustamante, K. Y. Rhee, and C. Jacobs-Wagner.  
58 2017. Crosstalk between the tricarboxylic acid cycle and peptidoglycan synthesis in  
59 *Caulobacter crescentus* through the homeostatic control of alpha-ketoglutarate. PLoS  
60 Genet 13(8):e1006978.
- 61 6. Dye, N. A., Z. Pincus, I. C. Fisher, L. Shapiro, and J. A. Theriot. 2011. Mutations in the  
62 nucleotide binding pocket of MreB can alter cell curvature and polar morphology in  
63 *Caulobacter*. Mol Microbiol 81(2):368-394.
- 64 7. Simon, R., U. Prierer, and A. Pühler. 1983. A broad host range mobilization system for in  
65 vivo genetic engineering: transposon mutagenesis in Gram negative bacteria.  
66 Bio/Technology 1(9):784-791.

- 67 8. Ursell, T. S., J. Nguyen, R. D. Monds, A. Colavin, G. Billings, N. Ouzounov, Z. Gitai, J.  
68 W. Shaevitz, and K. C. Huang. 2014. Rod-like bacterial shape is maintained by feedback  
69 between cell curvature and cytoskeletal localization. *PNAS* 111(11):E1025-1034.
- 70 9. Thanbichler, M., A. A. Iniesta, and L. Shapiro. 2007. A comprehensive set of plasmids  
71 for vanillate- and xylose-inducible gene expression in *Caulobacter crescentus*. *Nucleic*  
72 *Acids Res* 35(20):e137.
- 73 10. Amann, E., B. Ochs, and K. J. Abel. 1988. Tightly regulated tac promoter vectors useful  
74 for the expression of unfused and fused proteins in *Escherichia coli*. *Gene* 69(2):301-315.
- 75 11. Lee, T. S., R. A. Krupa, F. Zhang, M. Hajimorad, W. J. Holtz, N. Prasad, S. K. Lee, and  
76 J. D. Keasling. 2011. BglBrick vectors and datasheets: A synthetic biology platform for  
77 gene expression. *J Biol Eng* 5:12.
- 78 12. Norrander, J., T. Kempe, and J. Messing. 1983. Construction of improved M13 vectors  
79 using oligodeoxynucleotide-directed mutagenesis. *Gene* 26(1):101-106.
- 80 13. Chin, J. W., A. B. Martin, D. S. King, L. Wang, and P. G. Schultz. 2002. Addition of a  
81 photocrosslinking amino acid to the genetic code of *Escherichia coli*. *Proc Natl Acad Sci*  
82 *U S A* 99(17):11020-11024.
- 83 14. Cox, R. S., 3rd, M. J. Dunlop, and M. B. Elowitz. 2010. A synthetic three-color scaffold  
84 for monitoring genetic regulation and noise. *J Biol Eng* 4:10.
- 85 15. Madeira, F., Y. M. Park, J. Lee, N. Buso, T. Gur, N. Madhusoodanan, P. Basutkar, A. R.  
86 N. Tivey, S. C. Potter, R. D. Finn, and R. Lopez. 2019. The EMBL-EBI search and  
87 sequence analysis tools APIs in 2019. *Nucleic Acids Res*.

88

89 **Table S1: Strains used in this study.**

90

| <i>C. crescentus</i> |                                                                        |                                                                     |            |
|----------------------|------------------------------------------------------------------------|---------------------------------------------------------------------|------------|
| Strain               | Genotype                                                               | Construction                                                        | Source     |
| NA1000               | Synchronizable variant of wild-type <i>C. crescentus</i> strain CB15   |                                                                     | (4)        |
| ZG949                | Pxyl- <i>aimB</i> (Gateway)                                            | <i>In vivo</i> Gateway cloning of conserved hypothetical genes      | This study |
| ZG1511               | <i>mreB::mreB-GFP<sup>SW</sup></i>                                     | Transformation of NA1000 with pZG1534 followed by sucrose selection | This study |
| ZG870                | pBXMCS-Pxyl- <i>aimB</i>                                               | Transformation of NA1000 with pZG825                                | This study |
| ZG871                | pBXMCS-Pxyl- <i>aimB</i> -FLAG                                         | Transformation of NA1000 with pZG826                                | This study |
| EK25                 | <i>mreB::mreB-GFP<sup>SW</sup></i> ;<br>pBXMCS-Pxyl- <i>aimB</i> -FLAG | Transformation of ZG1511 with pZG826                                | This study |
| ZG883                | pBXMCS-2                                                               | Transformation of NA1000 with pBXMCS-2                              | This study |

|         |                                                                    |                                       |            |
|---------|--------------------------------------------------------------------|---------------------------------------|------------|
| CJW5939 | <i>ΔvanA::pV-dcas9hum-RBSmut1</i> with plasmid psgRNA-base         |                                       | (5)        |
| EK335   | <i>ΔvanA::pV-dcas9hum-RBSmut1</i> with plasmid psgRNA- <i>aimB</i> | Transformation of CJW6270 with pEK334 | This study |
| CJW6270 | <i>ΔvanA::pV-dcas9hum-RBSmut1</i>                                  |                                       | (5)        |
| JAT684  | <i>PmreB::T167A-mreB</i>                                           |                                       | (6)        |
| JAT669  | <i>PmreB::L23P-mreB</i>                                            |                                       | (6)        |
| JAT692  | <i>PmreB::D192G-mreB</i>                                           |                                       | (6)        |
| JAT699  | <i>PmreB::V324A-mreB</i>                                           |                                       | (6)        |
| ZG896   | <i>PmreB::L23P-mreB</i> ; pBXMCS-AimB                              | Transformation of JAT669 with pZG825  | This study |
| ZG897   | <i>PmreB::T167A-mreB</i> ; pBXMCS-AimB                             | Transformation of JAT684 with pZG825  | This study |
| ZG898   | <i>PmreB::D192G-mreB</i> ; pBXMCS-AimB                             | Transformation of JAT692 with pZG825  | This study |
| ZG899   | <i>PmreB::V324A-mreB</i> ; pBXMCS-AimB                             | Transformation of JAT699 with pZG825  | This study |
| ZG917   | <i>PmreB::A171V-mreB</i>                                           | AimB-overexpression suppressor screen | This study |

|       |                              |                                                                          |            |
|-------|------------------------------|--------------------------------------------------------------------------|------------|
| ZG918 | <i>PmreB::K236T-mreB</i>     | AimB-overexpression<br>suppressor screen                                 | This study |
| ZG920 | <i>PmreB::T277A-mreB</i>     | AimB-overexpression<br>suppressor screen                                 | This study |
| ZG921 | <i>PmreB::I290M-mreB</i>     | AimB-overexpression<br>suppressor screen                                 | This study |
| ZG922 | <i>PmreB::M74I-mreB</i>      | AimB-overexpression<br>suppressor screen                                 | This study |
| ZG923 | <i>PmreB::A20G-mreB</i>      | AimB-overexpression<br>suppressor screen                                 | This study |
| ZG924 | <i>PmreB::N21G-mreB</i>      | AimB-overexpression<br>suppressor screen                                 | This study |
| ZG925 | <i>PmreB::V170A-mreB</i>     | AimB-overexpression<br>suppressor screen                                 | This study |
| ZG926 | <i>PmreB::T168A-mreB</i>     | AimB-overexpression<br>suppressor screen                                 | This study |
| ZG928 | <i>PmreB::A325T-mreB</i>     | AimB-overexpression<br>suppressor screen                                 | This study |
| EK398 | <i>pBXMCS-jann_2546-FLAG</i> | Transformation of NA1000<br>with pEK397                                  | This study |
| EK399 | <i>aimB::aimB-FLAG</i>       | Transformation of NA1000<br>with pEK391 followed by<br>sucrose selection | This study |



| <i>E. coli</i> |                                                                                           |                                            |                         |
|----------------|-------------------------------------------------------------------------------------------|--------------------------------------------|-------------------------|
| Strain         | Genotype                                                                                  | Construction                               | Source                  |
| S17-1          | $\lambda$ -pir cloning strain, Spec <sup>R</sup>                                          |                                            | (7)                     |
| XL1-Blue       | Cloning strain, Tet <sup>R</sup>                                                          |                                            | Agilent<br>Technologies |
| ZG1516         | <i>mreB::mreB-GFP<sup>SW</sup></i>                                                        |                                            | (8)                     |
| EK191          | <i>mreB::mreB-GFP<sup>SW</sup></i> ; Plac-<br><i>aimB</i> -FLAG                           | Transformation of ZG1516<br>with pEK188    | This study              |
| EK192          | <i>mreB::mreB-GFP<sup>SW</sup></i> ; Ptet-<br><i>aimB</i> -FLAG (low copy)                | Transformation of ZG1516<br>with pEK189    | This study              |
| EK200          | <i>mreB::mreB-GFP<sup>SW</sup></i> ; Ptet-<br><i>aimB</i> -FLAG (high copy)               | Transformation of ZG1516<br>with pEK199    | This study              |
| NO36           | $\Delta$ <i>mreB</i> (MC4100)                                                             |                                            | Lab collection          |
| EK85           | $\Delta$ <i>mreB</i> ; pEVOL-pBpF                                                         | Transformation of NO36<br>with pEVOL-pBpF  | This study              |
| MreBXL-<br>con | $\Delta$ <i>mreB</i> ; pEVOL-pBpF; Plac-<br><i>mreB</i> /Para- <i>aimB</i>                | Transformation of EK85<br>with pMreBXL-con | This study              |
| MreBXL-1       | $\Delta$ <i>mreB</i> ; pEVOL-pBpF; Plac-<br><i>mreB</i> <sup>K58</sup> /Para- <i>aimB</i> | Transformation of EK85<br>with pMreBXL-1   | This study              |
| MreBXL-2       | $\Delta$ <i>mreB</i> ; pEVOL-pBpF; Plac-<br><i>mreB</i> <sup>L61</sup> /Para- <i>aimB</i> | Transformation of EK85<br>with pMreBXL-2   | This study              |

|           |                                                                                     |                                           |            |
|-----------|-------------------------------------------------------------------------------------|-------------------------------------------|------------|
| MreBXL-3  | $\Delta mreB$ ; pEVOL-pBpF; Plac-<br><i>mreB</i> <sup>G62</sup> /Para- <i>aimB</i>  | Transformation of EK85<br>with pMreBXL-3  | This study |
| MreBXL-4  | $\Delta mreB$ ; pEVOL-pBpF; Plac-<br><i>mreB</i> <sup>P65</sup> /Para- <i>aimB</i>  | Transformation of EK85<br>with pMreBXL-4  | This study |
| MreBXL-5  | $\Delta mreB$ ; pEVOL-pBpF; Plac-<br><i>mreB</i> <sup>E69</sup> /Para- <i>aimB</i>  | Transformation of EK85<br>with pMreBXL-5  | This study |
| MreBXL-6  | $\Delta mreB$ ; pEVOL-pBpF; Plac-<br><i>mreB</i> <sup>A70</sup> /Para- <i>aimB</i>  | Transformation of EK85<br>with pMreBXL-6  | This study |
| MreBXL-7  | $\Delta mreB$ ; pEVOL-pBpF; Plac-<br><i>mreB</i> <sup>R75</sup> /Para- <i>aimB</i>  | Transformation of EK85<br>with pMreBXL-7  | This study |
| MreBXL-8  | $\Delta mreB$ ; pEVOL-pBpF; Plac-<br><i>mreB</i> <sup>E83</sup> /Para- <i>aimB</i>  | Transformation of EK85<br>with pMreBXL-8  | This study |
| MreBXL-9  | $\Delta mreB$ ; pEVOL-pBpF; Plac-<br><i>mreB</i> <sup>F102</sup> /Para- <i>aimB</i> | Transformation of EK85<br>with pMreBXL-9  | This study |
| MreBXL-10 | $\Delta mreB$ ; pEVOL-pBpF; Plac-<br><i>mreB</i> <sup>T116</sup> /Para- <i>aimB</i> | Transformation of EK85<br>with pMreBXL-10 | This study |
| MreBXL-11 | $\Delta mreB$ ; pEVOL-pBpF; Plac-<br><i>mreB</i> <sup>G149</sup> /Para- <i>aimB</i> | Transformation of EK85<br>with pMreBXL-11 | This study |
| MreBXL-12 | $\Delta mreB$ ; pEVOL-pBpF; Plac-<br><i>mreB</i> <sup>G166</sup> /Para- <i>aimB</i> | Transformation of EK85<br>with pMreBXL-12 | This study |
| MreBXL-13 | $\Delta mreB$ ; pEVOL-pBpF; Plac-<br><i>mreB</i> <sup>T167</sup> /Para- <i>aimB</i> | Transformation of EK85<br>with pMreBXL-13 | This study |

|           |                                                                                     |                                           |            |
|-----------|-------------------------------------------------------------------------------------|-------------------------------------------|------------|
| MreBXL-14 | $\Delta mreB$ ; pEVOL-pBpF; Plac-<br><i>mreB</i> <sup>R185</sup> /Para- <i>aimB</i> | Transformation of EK85<br>with pMreBXL-14 | This study |
| MreBXL-15 | $\Delta mreB$ ; pEVOL-pBpF; Plac-<br><i>mreB</i> <sup>E193</sup> /Para- <i>aimB</i> | Transformation of EK85<br>with pMreBXL-15 | This study |
| MreBXL-16 | $\Delta mreB$ ; pEVOL-pBpF; Plac-<br><i>mreB</i> <sup>I196</sup> /Para- <i>aimB</i> | Transformation of EK85<br>with pMreBXL-16 | This study |
| MreBXL-17 | $\Delta mreB$ ; pEVOL-pBpF; Plac-<br><i>mreB</i> <sup>R200</sup> /Para- <i>aimB</i> | Transformation of EK85<br>with pMreBXL-17 | This study |
| MreBXL-18 | $\Delta mreB$ ; pEVOL-pBpF; Plac-<br><i>mreB</i> <sup>H202</sup> /Para- <i>aimB</i> | Transformation of EK85<br>with pMreBXL-18 | This study |
| MreBXL-19 | $\Delta mreB$ ; pEVOL-pBpF; Plac-<br><i>mreB</i> <sup>E209</sup> /Para- <i>aimB</i> | Transformation of EK85<br>with pMreBXL-19 | This study |
| MreBXL-20 | $\Delta mreB$ ; pEVOL-pBpF; Plac-<br><i>mreB</i> <sup>K217</sup> /Para- <i>aimB</i> | Transformation of EK85<br>with pMreBXL-20 | This study |
| MreBXL-21 | $\Delta mreB$ ; pEVOL-pBpF; Plac-<br><i>mreB</i> <sup>L240</sup> /Para- <i>aimB</i> | Transformation of EK85<br>with pMreBXL-21 | This study |
| MreBXL-22 | $\Delta mreB$ ; pEVOL-pBpF; Plac-<br><i>mreB</i> <sup>A260</sup> /Para- <i>aimB</i> | Transformation of EK85<br>with pMreBXL-22 | This study |
| MreBXL-23 | $\Delta mreB$ ; pEVOL-pBpF; Plac-<br><i>mreB</i> <sup>A276</sup> /Para- <i>aimB</i> | Transformation of EK85<br>with pMreBXL-23 | This study |
| MreBXL-24 | $\Delta mreB$ ; pEVOL-pBpF; Plac-<br><i>mreB</i> <sup>T277</sup> /Para- <i>aimB</i> | Transformation of EK85<br>with pMreBXL-24 | This study |

|           |                                                                                           |                                                |            |
|-----------|-------------------------------------------------------------------------------------------|------------------------------------------------|------------|
| MreBXL-25 | $\Delta mreB$ ; pEVOL-pBpF; Plac-<br><i>mreB</i> <sup>D287</sup> /Para- <i>aimB</i>       | Transformation of EK85<br>with pMreBXL-25      | This study |
| MreBXL-26 | $\Delta mreB$ ; pEVOL-pBpF; Plac-<br><i>mreB</i> <sup>K339</sup> /Para- <i>aimB</i>       | Transformation of EK85<br>with pMreBXL-26      | This study |
| EK210     | $\Delta mreB$ ; pEVOL-pBpF; Plac-<br><i>mreB</i> <sup>R185</sup> /Para- <i>aimB</i> -FLAG | Transformation of EK85<br>with pMreBXL-14-FLAG | This study |

92 **Table S2: Plasmids used in this study.**

93

| <b>Name</b> | <b>Description</b>                                                                                                                   | <b>Source</b>             |
|-------------|--------------------------------------------------------------------------------------------------------------------------------------|---------------------------|
| pZG241      | Gateway destination vector based on pJS14 modified to include a xylose-inducible promoter, Tet <sup>R</sup>                          | (2)                       |
| pNPTS-138   | <i>sacB</i> expressing plasmid used for allelic exchange in <i>C. crescentus</i> , Kan <sup>R</sup>                                  | M.R.K. Alley, unpublished |
| pZG1534     | pNPTS-138 based plasmid for replacing the chromosomal <i>C. crescentus mreB</i> with <i>mreB-GFP<sup>SW</sup></i> , Kan <sup>R</sup> | This study                |
| pBXMCS-2    | <i>C. crescentus</i> high-copy plasmid with a xylose-inducible promoter, Kan <sup>R</sup>                                            | (9)                       |
| pZG825      | pBXMCS-2-based plasmid for <i>aimB</i> expression, Kan <sup>R</sup>                                                                  | This study                |
| pZG826      | pBXMCS-2-based plasmid for <i>aimB-FLAG</i> expression, Kan <sup>R</sup>                                                             | This study                |
| psgRNA-Base | sgRNA cloning vector for CRISPRi, Kan <sup>R</sup>                                                                                   | (5)                       |
| pEK334      | <i>aimB</i> sgRNA expression plasmid, Kan <sup>R</sup>                                                                               | This study                |
| pTrc99a     | Ptac containing expression vector used for IPTG induced overexpression in <i>E. coli</i> , Carb <sup>R</sup>                         | (10)                      |
| pEK188      | pTrc99a-based plasmid for <i>aimB-FLAG</i> expression, Carb <sup>R</sup>                                                             | This study                |

|                 |                                                                                                                                                                                   |            |
|-----------------|-----------------------------------------------------------------------------------------------------------------------------------------------------------------------------------|------------|
| pBbs2k          | Ptet containing low-copy expression vector used for anhydro-tetracycline induced overexpression in <i>E. coli</i> , Kan <sup>R</sup>                                              | (11)       |
| pEK189          | pBbs2k-based plasmid for <i>aimB</i> -FLAG expression, Kan <sup>R</sup>                                                                                                           | This study |
| pUC19           | Plac containing high-copy expression vector used for IPTG induced overexpression in <i>E. coli</i> , Carb <sup>R</sup>                                                            | (12)       |
| pEK199          | pUC19-based plasmid with Plac replaced with Ptet- <i>aimB</i> -FLAG, Carb <sup>R</sup>                                                                                            | This study |
| pEVOL-pBpF      | Plasmid encoding a tRNA synthetase/tRNA pair for <i>in vivo</i> incorporation of p-benzoyl-l-phenylalanine in <i>E. coli</i> amber codons (Addgene #31190), Cm <sup>R</sup>       | (13)       |
| pZS2-123        | Cloning plasmid with 3 promoters to drive independent expression of CFP, YFP, and mCherry (Addgene #26598), Kan <sup>R</sup>                                                      | (14)       |
| pEK70           | pZS2-123 derived plasmid with CFP cassette removed and mCherry replaced with <i>aimB</i> , Kan <sup>R</sup>                                                                       | This study |
| pMreBXL series  | pEK70-derived plasmids with YFP replaced by <i>mreB</i> containing the respective amber codon mutation; <i>mreB</i> mutants synthesized by Genscript (Table S1), Kan <sup>R</sup> | This study |
| pMreBXL-14-FLAG | pMreBXL-14-based plasmid with an AimB C-terminal FLAG tag, Kan <sup>R</sup>                                                                                                       | This study |

|        |                                                                                                                          |            |
|--------|--------------------------------------------------------------------------------------------------------------------------|------------|
| pEK796 | Codon optimized <i>jann_2546-FLAG</i> cloned into pUC57; synthesized by Genscript, Carb <sup>R</sup>                     | This study |
| pEK397 | pBXMCS-2 derived plasmid for xylose-inducible expression of <i>Jann_2546-FLAG</i> , Kan <sup>R</sup>                     | This study |
| pEK391 | pNPTS-138 based plasmid for replacing the chromosomal <i>C. crescentus aimB</i> with <i>aimB-FLAG</i> , Kan <sup>R</sup> | This study |

95 **Table S3: Primers used in this study.**

96

| Name                   | Sequence                                             |
|------------------------|------------------------------------------------------|
| <i>Cloning primers</i> |                                                      |
| pNPTS-F                | CTCTGCAGGATATCTGGATC                                 |
| pNPTS-R                | CTAGTGAGTCGTATTACGTAG                                |
| mreB-up-F              | cgtaatacgaactactagTGTTCAAGGAACGCCTGACCCCTTGCAGGTGGTC |
| mreB-up-R              | gagccagaGCCGTCCGCCGGCGCGCG                           |
| msfGFP-F               | cgacggcTCTGGCTCGAGCAGTAAAGGTGAAGAAC                  |
| msfGFP-R               | gaccttcGCCCCGGCGCGCCAGATTT                           |
| mreB-down-F            | cgccgggcGAAGGTCTGTTCGATCGACG                         |
| mreB-down-R            | ccagatatcctgcagagAAGCTTGGGATTGGGCC                   |
| aimB-F                 | tactcatATGACCACCTTCGACGAACG                          |
| aimB-R                 | tactgaattcTTACTCAGACTTGATCTGCTCGCG                   |
| aimB-FLAG-F            | gacgacgacaagTAAGCGCTCGGAGCGTCG                       |
| aimB-FLAG-R            | gtcctttagtcCTCAGACTTGATCTGCTCGCG                     |
| EK582                  | tactaagcttGTACTCGCTGATCCGGTTGT                       |
| EK585                  | tactgaattcGGACAGTACTACGGCCATCC                       |
| EK644                  | TAGAACTTCCGAGAAGTTCA                                 |
| EK645                  | GGTGGTTTGTGGCCGATC                                   |
| EK646                  | TAATAACCAGGCATCAAATAAAACGAAAGGC                      |
| EK647                  | GGCAGGTGCTCCTTCTTAAAGTT                              |
| EK648                  | tattgatgcctgttattattaCTCAGACTTGATCTGCTCGC            |
| EK649                  | agaaggagcacctgccatgACCACCTTCGACGAACG                 |
| EK679                  | TAATAATAACCAGGCATCAAATAAAACGAAAGG                    |
| EK680                  | cttgatcgtcatcctttagtcCTCAGACTTGATCTGCTCGCG           |
| EK807                  | ATGTATATCTCCTTCTTAAAGATCTTTTGAATTCTTTTC              |



|        |                                             |
|--------|---------------------------------------------|
| EK808  | GGATCCAAACTCGAGTAAG                         |
| EK809  | ttaagaaggagatatacatATGACCACCTTCGACGAAC      |
| EK810  | actcgagttggatccTACTTGTCGTCGTCGTC            |
| EK811  | GGTCTGTTTCCTGTGTGAAATTG                     |
| EK812  | GGATCCTCTAGAGTCGACC                         |
| EK813  | acacaggaacagaccATGACCACCTTCGACGAAC          |
| EK814  | cgactctagaggatccTACTTGTCGTCGTCGTC           |
| EK838  | CGAGCTCGAATTCACTGGCC                        |
| EK839  | CCTGCAGGCATGCAAGCTTG                        |
| EK840  | agtgaattcgagctcgTTAAGACCCACTTTCACATTTAAG    |
| EK841  | ttgcatgcctgcaggTATAAACGCAGAAAGGCC           |
| EK1003 | tagtgGCGTTCGTCGAAGGTGGTCA                   |
| EK1004 | aaacTGACCACCTTCGACGAACGCc                   |
| EK1150 | gtcgtcgtcGTCCTTGTAGTCCTCAGACTTGATCTGCTCGCGG |
| EK1151 | tacaaggacGACGACGACAAGTAAGCGCTCGGAGCGTCG     |
| EK1175 | tactcatATGAGCACCTTCGACGACCG                 |
| EK1176 | tactgaattcTACTTGTCGTCGTCGTCCTTGT            |
| EKS212 | CGGATGAAGTGGTTCTGGAC                        |
| EKS260 | TACTTGTCGTCGTCGTCCTTGTAG                    |

97

| <i>QPCR primers</i> | <i>Forward</i>       | <i>Reverse</i>       |
|---------------------|----------------------|----------------------|
| <i>rpoD</i>         | CTCTATGCGATCAACAAGCG | ATAGGCCTTGAGGAACTCGC |
| <i>aimB</i>         | ACGTGCTGCGCAAGGTCT   | CCAGCAGCTCGGCCATTT   |

98

99

100 **Table S4: MD simulation systems in this study.**

| <b>Name</b>                         | <b>Structure source</b>                                               | <b>Ligand</b>                                  | <b>Atoms</b> | <b>Simulation time<br/>(ns)</b> | <b>Replicates</b> |
|-------------------------------------|-----------------------------------------------------------------------|------------------------------------------------|--------------|---------------------------------|-------------------|
| <i>CcMreB</i>                       | PDB ID: 4CZM                                                          | ATP, Mg <sup>2+</sup>                          | 84,000       | 100                             | 1                 |
| <i>EcMreB</i>                       | PDB ID: 4CZM<br>(homology model)                                      | ATP, Mg <sup>2+</sup>                          | 84,000       | 100                             | 1                 |
| <i>CcMreB</i> -<br><i>AimB</i>      | PDB ID: 4CZM;<br>PDB ID: 2KZC<br>(homology model)                     | ATP,<br>Mg <sup>2+</sup> ,<br><i>AimB</i>      | 89,000       | 100                             | 2                 |
| <i>EcMreB</i> -<br><i>AimB</i>      | PDB ID: 4CZM<br>(homology model);<br>PDB ID: 2KZC<br>(homology model) | ATP,<br>Mg <sup>2+</sup> ,<br><i>AimB</i>      | 89,000       | 100                             | 2                 |
| <i>CcMreB</i> -<br><i>Jann_2546</i> | PDB ID: 4CZM;<br>PDB ID: 2KZC                                         | ATP,<br>Mg <sup>2+</sup> ,<br><i>Jann_2546</i> | 89,000       | 100                             | 2                 |

101

102 **Supplemental Figures**

103

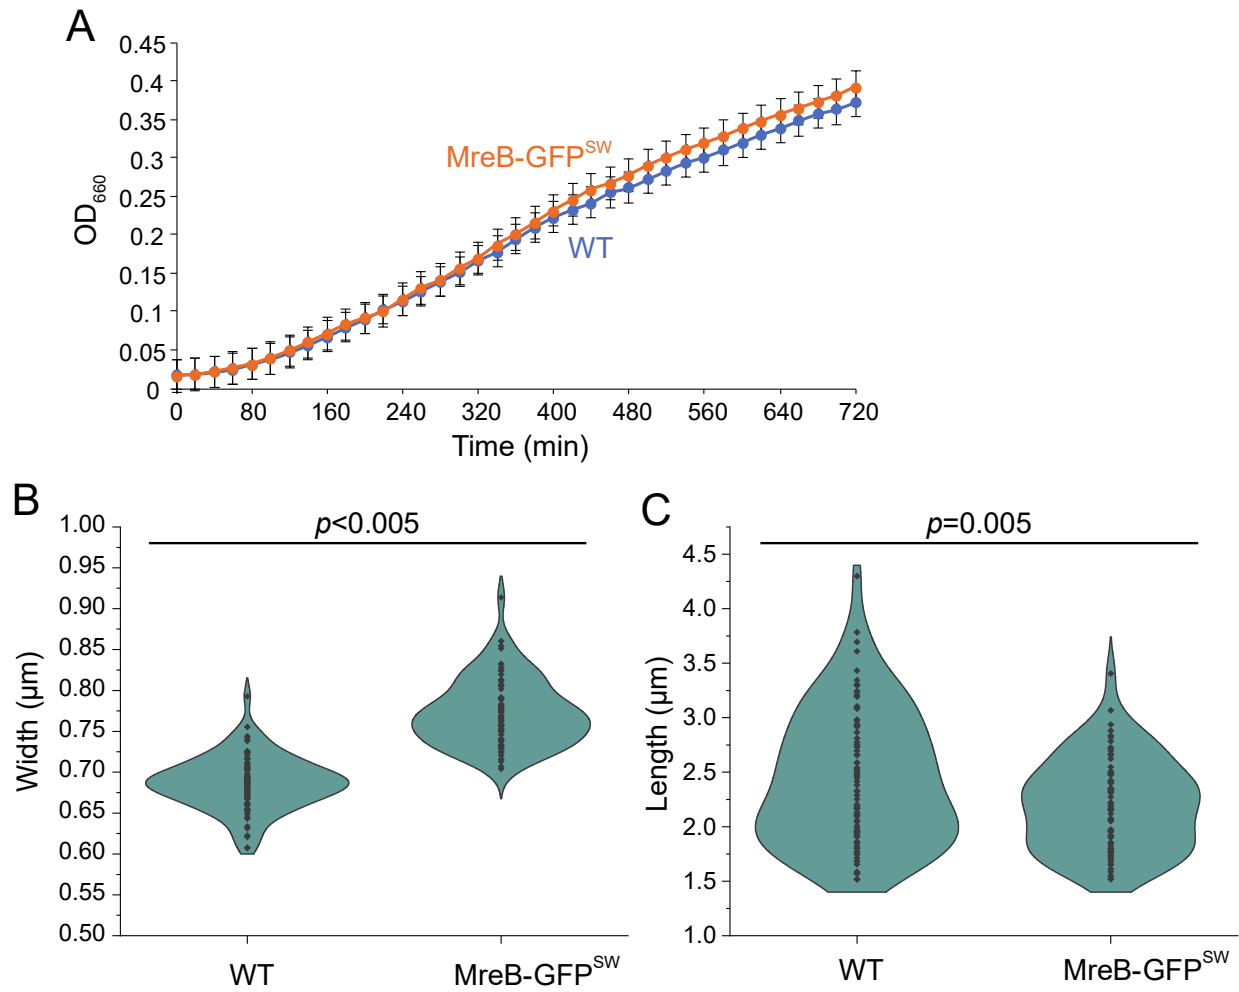

104

105 **Supplemental Figure 1: MreB-GFP<sup>SW</sup> minimally perturbs *C. crescentus* growth and shape.**

106 A) The growth of wild-type and MreB-GFP<sup>SW</sup> cells as measured by optical density was  
107 virtually identical. Error bars are the standard error of the mean (n=3).

108 B,C) Wild-type and MreB-GFP<sup>SW</sup> cells were imaged by phase microscopy for quantification  
109 of cell width (B) and length (C) (n>70 cells per strain; p-values: two-tailed t-test). The  
110 MreB sandwich fusion caused a small increase in cell width.

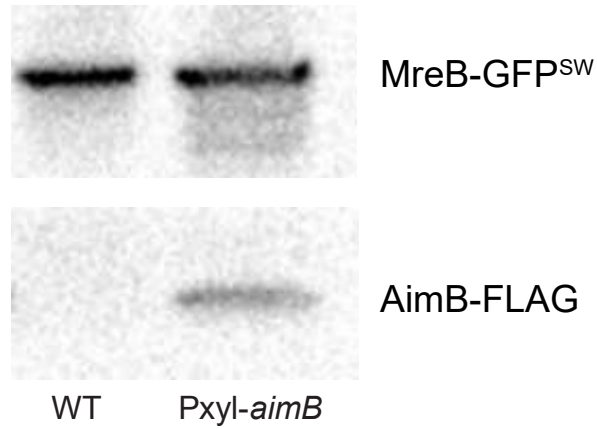

111

112 **Supplemental Figure 2: Relative expression levels of MreB and AimB in *C. crescentus*.**

113 AimB-FLAG and MreB-GFP<sup>SW</sup> expression were assayed by immunoblotting. Samples  
 114 were normalized by OD. AimB-FLAG expression was induced in *C. crescentus* with  
 115 0.3% xylose for 9 h. Cultures were back-diluted 1:100 after 4.5 h to keep cells in log-  
 116 phase.

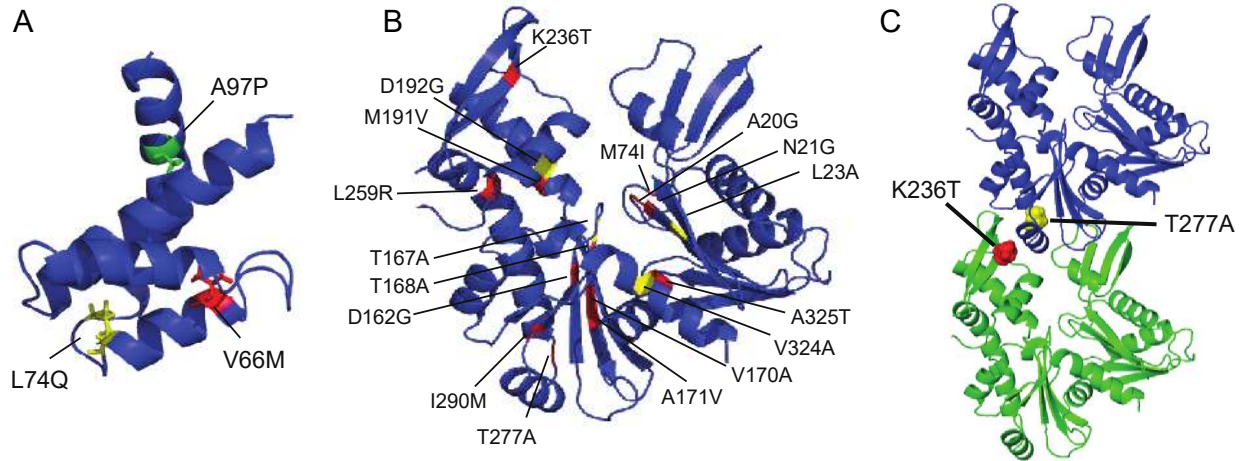

117

118 **Supplemental Figure 3: Identification of AimB-overexpression suppressor mutants.**

119 (A-C) The locations of the identified AimB-overexpression suppressor mutants are  
 120 mapped to structures for AimB (A), MreB (B), and the MreB longitudinal  
 121 polymerization interface (C). In (C), two interacting MreB monomers are colored by  
 122 dark blue (top) and green (bottom), respectively.

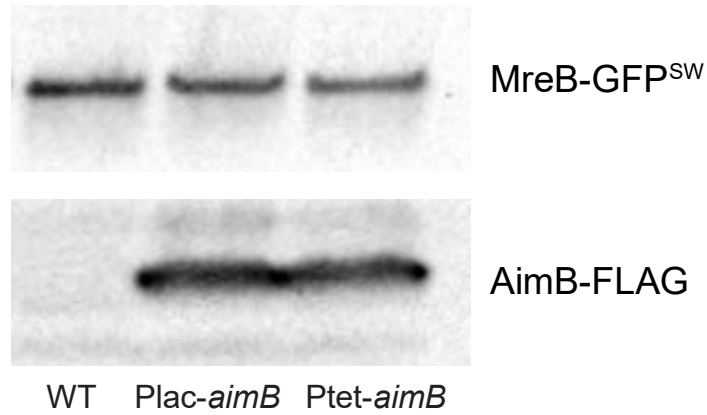

123

124 **Supplemental Figure 4: Relative expression levels of MreB and AimB in *E. coli*.**

125        AimB-FLAG and MreB-GFP<sup>SW</sup> expression were assayed by immunoblotting. Samples  
 126        were normalized by OD. AimB-FLAG expression was induced in *E. coli* with 1 mM  
 127        IPTG (Plac) or 100 ng/mL aTc (Ptet) for 9 h. Cultures were back-diluted 1:100 after 4.5 h  
 128        to keep cells in log-phase.

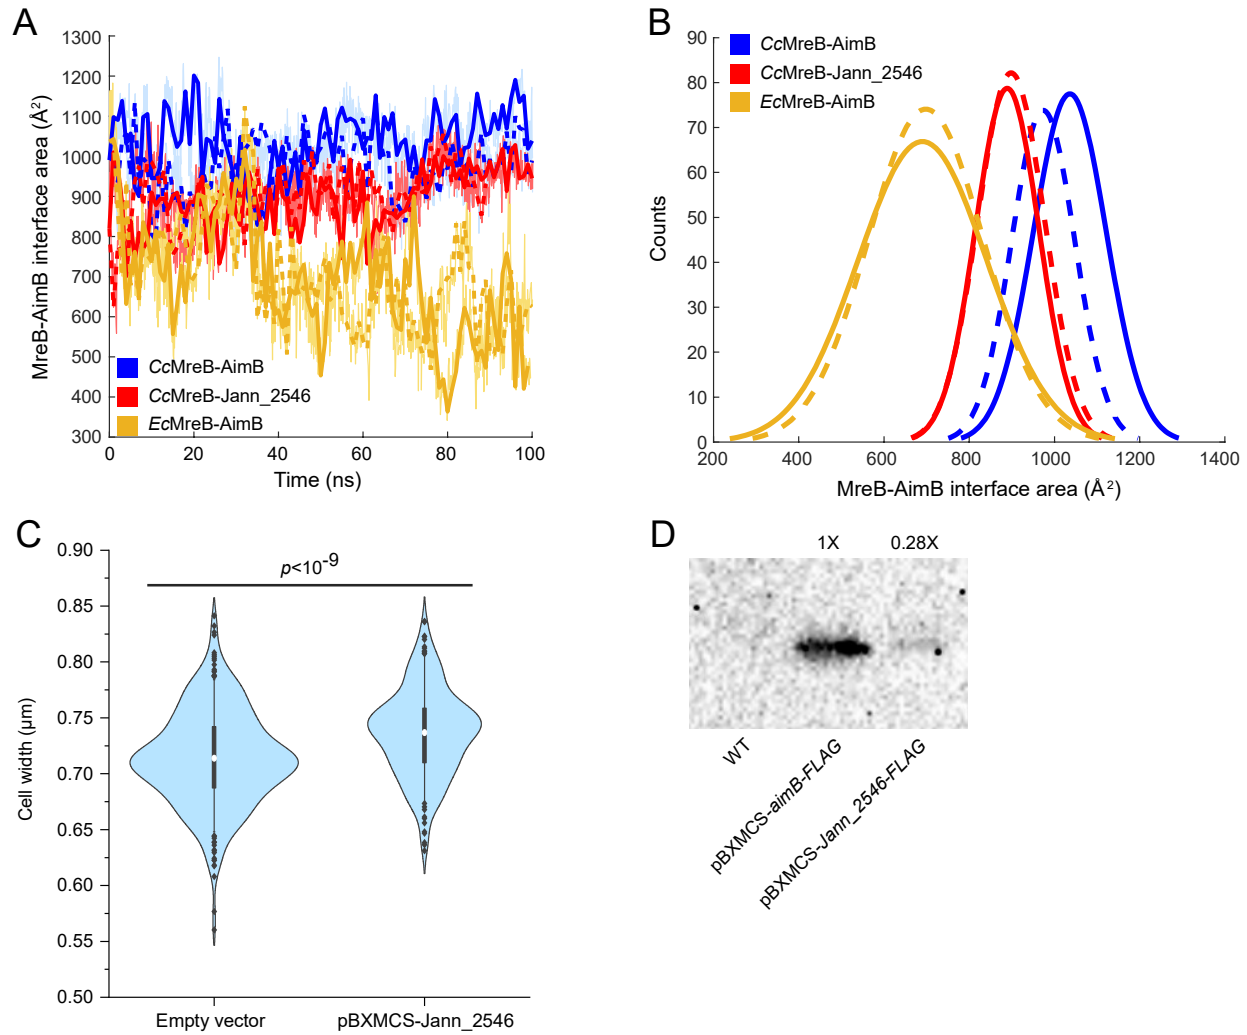

129

130 **Supplemental Figure 5: Justification of the AimB homology model.**

131 A) The interfacial area between MreB and AimB or Jann\_2546 showed that the docked  
 132 heterodimer of *Cc*MreB and either AimB homologue remained stable throughout 100 ns  
 133 of MD simulation, while the interfacial area of AimB docking to *Ec*MreB decreased over  
 134 time.

135 B) The distribution of interfacial areas over the course of the molecular dynamics  
 136 simulations in (A) demonstrated that Jann\_2546 interacts with *Cc*MreB in a manner  
 137 similar to AimB.

138 C) Overexpression of Jann\_2546 for 24 h resulted in a significant increase (4%) in cell width  
139 compared to cells harboring the empty expression plasmid ( $n > 230$  cells per strain;  $p$ -  
140 values, two-tailed t-test). White circles represent the mean of each sample.

141 D) AimB and Jann\_2546 were induced from the same plasmid backbone with 0.3% xylose  
142 for 8 h and assessed by Western blot. Image quantification indicated ~70% lower  
143 expression of Jann\_2546.





150 **Supplemental Movies**

151

152 **Movie S1: Molecular dynamics simulation of *CcMreB*-AimB interactions.** The interactions  
153 between AimB and *CcMreB* were simulated over 100 ns using molecular dynamics (see  
154 Methods). AimB remained stably associated with *CcMreB*.

155

156 **Movie S2: Molecular dynamics simulation of *EcMreB*-AimB interactions.** The interactions  
157 between AimB and *EcMreB* were simulated over 100 ns using molecular dynamics (see  
158 Methods). AimB did not remain stably associated with *EcMreB*.
